# Supplementary material for: Immune parameters of HIV susceptibility in the female genital tract before and after penile-vaginal sex
Source: PubMed Central journal article supplement (PMC9142516; doi:10.1038/s43856-022-00122-7), 2022-05-27
Supplement: 43856_2022_122_MOESM1_ESM.pdf [file 43856_2022_122_MOESM1_ESM.pdf]

## **Description of Additional Supplementary Files**

**File Name:** Supplementary Data 1

**Description:** Source data analysed for the Results section and the main figures.
