# Supplementary material for: Immune parameters of HIV susceptibility in the female genital tract before and after penile-vaginal sex
Source: PubMed Central journal article supplement (PMC9142516; doi:10.1038/s43856-022-00122-7), 2022-05-27
Supplement: 43856_2022_122_MOESM2_ESM.pdf [file 43856_2022_122_MOESM2_ESM.pdf]

1 **Title: Immune parameters of HIV susceptibility in the female genital tract before and after**  
2 **penile-vaginal sex**

3

4 **Avid Mohammadi<sup>1</sup>, Sareh Bagherichimeh<sup>1\*</sup>, Yoojin Choi<sup>2</sup>, Azadeh Fazel<sup>1</sup>, Elizabeth**  
5 **Tevelin<sup>3†</sup>, Sanja Huibner<sup>1</sup>, Sara V Good<sup>4</sup>, Wangari Tharao<sup>3</sup>, Rupert Kaul<sup>1</sup>**

6

7 **Affiliations:**

8 <sup>1</sup>Department of Medicine, University of Toronto, Toronto, Ontario, Canada.

9 <sup>2</sup>Department of Immunology, University of Toronto, Toronto, Ontario, Canada.

10 <sup>3</sup>Women's Health in Women's Hands Community Health Center, Toronto, Ontario, Canada.

11 <sup>4</sup>Department of Biology, University of Winnipeg, Winnipeg, Manitoba, Canada

12 \* Present address: Department of Pathology and Laboratory Medicine at Schulich Medicine and  
13 Dentistry, University of Western, London, Ontario, Canada.

14 † Present address: Street Health Community Nursing, Toronto, Ontario, Canada.

15 **Materials and Correspondence:** Dr. Rupert Kaul and/or Mrs. Avid Mohammadi. Department  
16 of Medicine, University of Toronto, Medical Sciences Building #6356, Toronto, Ontario,  
17 Canada, M5S 1A8. Tel: (1-416) 978-8607; Fax: (1-416) 978-8765. [Rupert.kaul@utoronto.ca](mailto:Rupert.kaul@utoronto.ca) ;  
18 [Avid.mohammadi@mail.utoronto.ca](mailto:Avid.mohammadi@mail.utoronto.ca)

19 **Conflict of interests:** The authors declare no competing interests.

20

21 **SUPPLEMENTARY TABLE 1. Participant characteristic in women who had condomless**  
 22 **sex based on circumcision status of the male partner**

23

24

| <b>Characteristic</b>               | <b>Uncircumcised (n=16)</b> | <b>Circumcised (n=13)</b> |
|-------------------------------------|-----------------------------|---------------------------|
| <b>Age (median; range)</b>          | 22 (18-33)                  | 21 (19-33)                |
| <b>Ethnicity</b>                    |                             |                           |
| Asian (East or South Asian)         | 7 (43.8)                    | 3 (23.1)                  |
| White                               | 5 (31.3)                    | 5 (38.5)                  |
| African-Caribbean and Black         | 1 (6.3)                     | 1 (7.7)                   |
| Latin American                      | 1 (6.3)                     | 0                         |
| Middle Eastern                      | 0                           | 1 (7.7)                   |
| Mixed                               | 2 (12.5)                    | 3 (23.1)                  |
| <b>Contraceptive method</b>         |                             |                           |
| Oral contraceptive pill             | 5 (31.3)                    | 5 (38.5)                  |
| Condom                              | 3 (18.8)                    | 1 (7.7)                   |
| Hormonal IUD                        | 2 (12.5)                    | 2 (15.4)                  |
| Copper IUD                          | 1 (6.3)                     | 2 (15.4)                  |
| NuvaRing                            | 1 (6.3)                     | 1 (7.7)                   |
| Condom and hormonal                 | 0                           | 1 (7.7)                   |
| None                                | 4 (25)                      | 1 (7.7)                   |
| <b>Vaginal douching</b>             | 2 (12.5)                    | 2 (15.4)                  |
| <b>Bacterial vaginosis</b>          | 2 (12.5)                    | 3 (23.1)                  |
| <b>Relationship length (months)</b> | 11 (1-72)                   | 24 (2-96)                 |
| <b>Time since last sex (days)</b>   | 3 (2-23)                    | 4 (3-10)                  |
| <b>STI history</b>                  | 2 (12.5)                    | 1 (7.7)                   |

34

35 **SUPPLEMENTARY TABLE 2. Baseline cytokine levels in semen based on circumcision**  
 36 **status**

37

| Cytokines                       | Semen                                |                                         | p-value |
|---------------------------------|--------------------------------------|-----------------------------------------|---------|
|                                 | Uncircumcised<br>(Median, range)     | Circumcised<br>(Median, range)          |         |
| <b>IP-10</b>                    | 40,643.17<br>(1,499.81-77,457.33)    | 35,328.39<br>(14,591.45,328,349.53)     | 0.934   |
| <b>MIG</b>                      | 23,426.74<br>(471.79-38,100.08)      | 23,820.07<br>(4,233.68-333,954.49)      | 0.561   |
| <b>MIP-1<math>\beta</math></b>  | 630.23<br>(124.64-10,281.91)         | 720.32<br>(134.80-8,346.62)             | 0.678   |
| <b>IL-8</b>                     | 1,045.19<br>(159.87-18,608.36)       | 1,182.54<br>(265.75-12,110)             | 0.901   |
| <b>MIP-3<math>\alpha</math></b> | 1,159.77<br>(20.54-5,4791.11)        | 919.04<br>(394.81-19,212.50)            | 0.901   |
| <b>IL-1<math>\alpha</math></b>  | 188.92<br>(79.46-2,695.76)           | 176.11<br>(72.10-64,079)                | 0.901   |
| <b>IL-6</b>                     | 8.11<br>(1.20-126.27)                | 8.42<br>(0.88-144.80)                   | 0.506   |
| <b>IL-17</b>                    | 11.79<br>(2.43-258)                  | 11.25<br>(4.20-644.94)                  | 0.835   |
| <b>IFN<math>\alpha</math>2a</b> | 39.63<br>(6.93-65.61)                | 39.04<br>(17.99-705.95)                 | 0.771   |
| <b>sE-cadherin</b>              | 290,649.64<br>(35,808.05-786,586.53) | 266,298.45<br>(129,735.20-3,053,534.76) | 0.739   |
| <b>MMP9</b>                     | 3,392.52<br>(461.92-1,246,997.34)    | 11,916.09<br>(164.55-723,728.70)        | 0.280   |

38

39

40

41 **SUPPLEMENTARY TABLE 3. Baseline cytokine levels in cervico-vaginal secretion based**  
 42 **on circumcision status of the male partner**

43

44

| Cytokines                       | Cervico-vaginal secretion            |                                      | p-value |
|---------------------------------|--------------------------------------|--------------------------------------|---------|
|                                 | Uncircumcised<br>(Median, range)     | Circumcised<br>(Median, range)       |         |
| <b>IP-10</b>                    | 2,214.90<br>(108.91-66,407.83)       | 1,458.19<br>(9.90-8,181.43)          | 0.599   |
| <b>MIG</b>                      | 124.60<br>(49.40-5,393.74)           | 153.57<br>(15.82-940.45)             | 0.792   |
| <b>MIP-1<math>\beta</math></b>  | 307.07<br>(139-3,979)                | 518.92<br>(139-4,784.98)             | 0.303   |
| <b>IL-8</b>                     | 28,435.45<br>(364.73-37,935.93)      | 24,851.75<br>(2,082.25-42,978.93)    | 0.630   |
| <b>MIP-3<math>\alpha</math></b> | 766.29<br>(119.82-19,736)            | 793.03<br>(73.43-17,573.81)          | 0.965   |
| <b>IL-1<math>\alpha</math></b>  | 23,507.52<br>(3,334.60-545,981.71)   | 43,041.81<br>(5,468.27-233,021.32)   | 0.079   |
| <b>IL-6</b>                     | 47.78<br>(3.71-2,524.54)             | 116.68<br>(5.05-2,302.65)            | 0.335   |
| <b>IL-17</b>                    | 25.89<br>(12-717.60)                 | 44.04<br>(12-411.25)                 | 0.403   |
| <b>IFN<math>\alpha</math>2a</b> | 16.4<br>(5.16-124.31)                | 24.54<br>(2.80-42.11)                | 0.826   |
| <b>sE-cadherin</b>              | 66,766.81<br>(1,980.38-2,169,304.19) | 111,666.7<br>(2,136.33-1,904,214.72) | 0.456   |
| <b>MMP9</b>                     | 21,473.07<br>(124.49-3,560,343.5)    | 576,234.27<br>(763.33-2,712,754.25)  | 0.288   |

45

46

47 **SUPPLEMENTARY FIGURE 1. The levels of cytokines in cervico-vaginal secretions and**  
48 **semen**

49

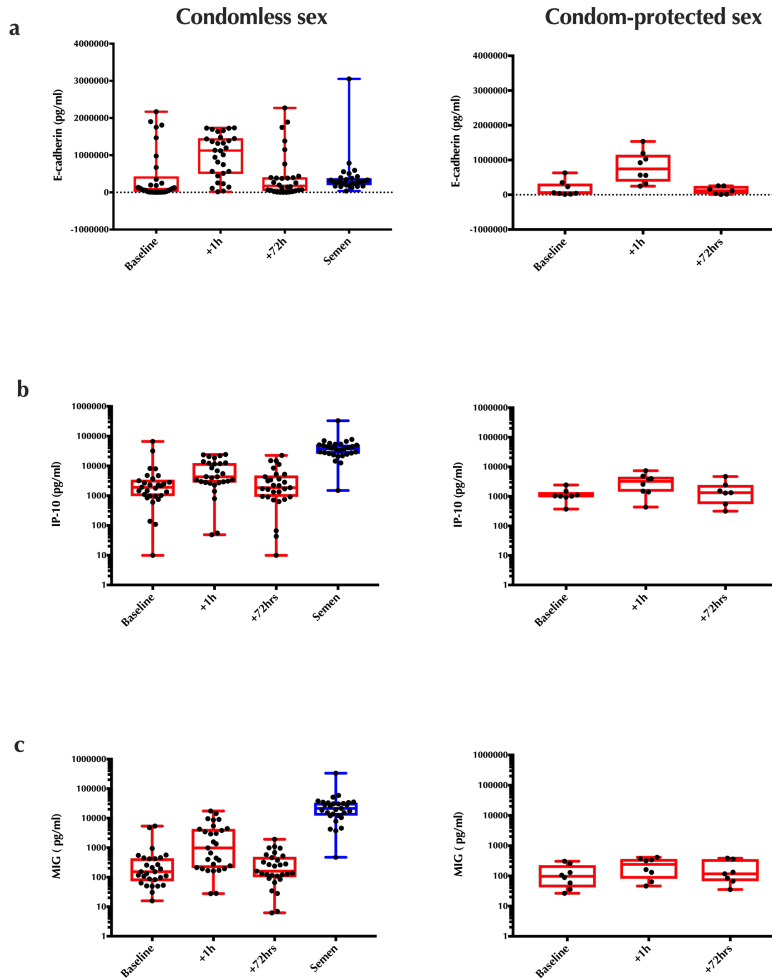

50

51

52 **SUPPLEMENTARY FIGURE 1. The levels of cytokines in cervico-vaginal secretions and**

53 **semen. The level of (a) soluble E-cadherin (pg/ml), (b) IP-10 (pg/ml), (c) MIG (pg/ml), in**

54 **cervico-vaginal secretion (baseline, 1 hour and 72 hours) after condomless (N=29) and condom-**

55 **protected sex (N=8), and semen (baseline). The box plots represent the median, with interquartile**

56 **and minimum to maximum ranges. The red box plots represent cervico-vaginal secretions, and**

57 **the blue box plots represent semen.**

58 **SUPPLEMENTARY FIGURE 2. Baseline levels of cytokines in cervico-vaginal secretion of**  
59 **BV+ and BV- women.**

60

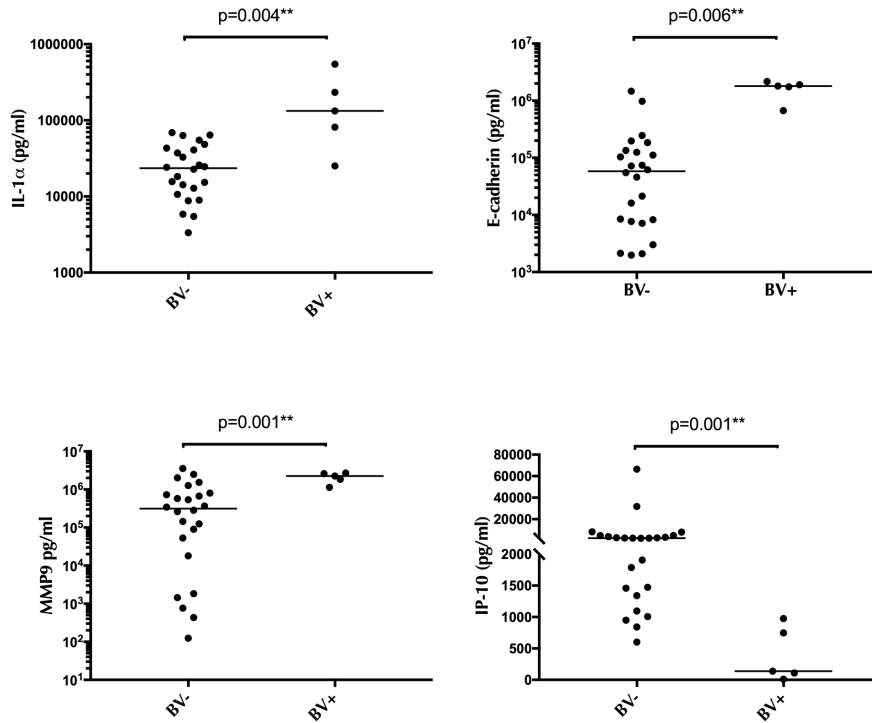

61

62

63 **SUPPLEMENTARY FIGURE 2. Baseline levels of cytokines in cervicovaginal secretions of**

64 **BV+ and BV- women.** The level of cervico-vaginal cytokine concentrations is compared

65 between BV+ (N=5) and BV- women (N=24) in condomless group. Statistical comparisons were

66 performed using Mann-Witney U test. BV stands for bacterial vaginosis.

67

68

69

70 SUPPLEMENTARY FIGURE 3. Gating strategy and representative plots for endocervical  
71 activated, CCR5+ and memory CD4+ T cells subsets.

72

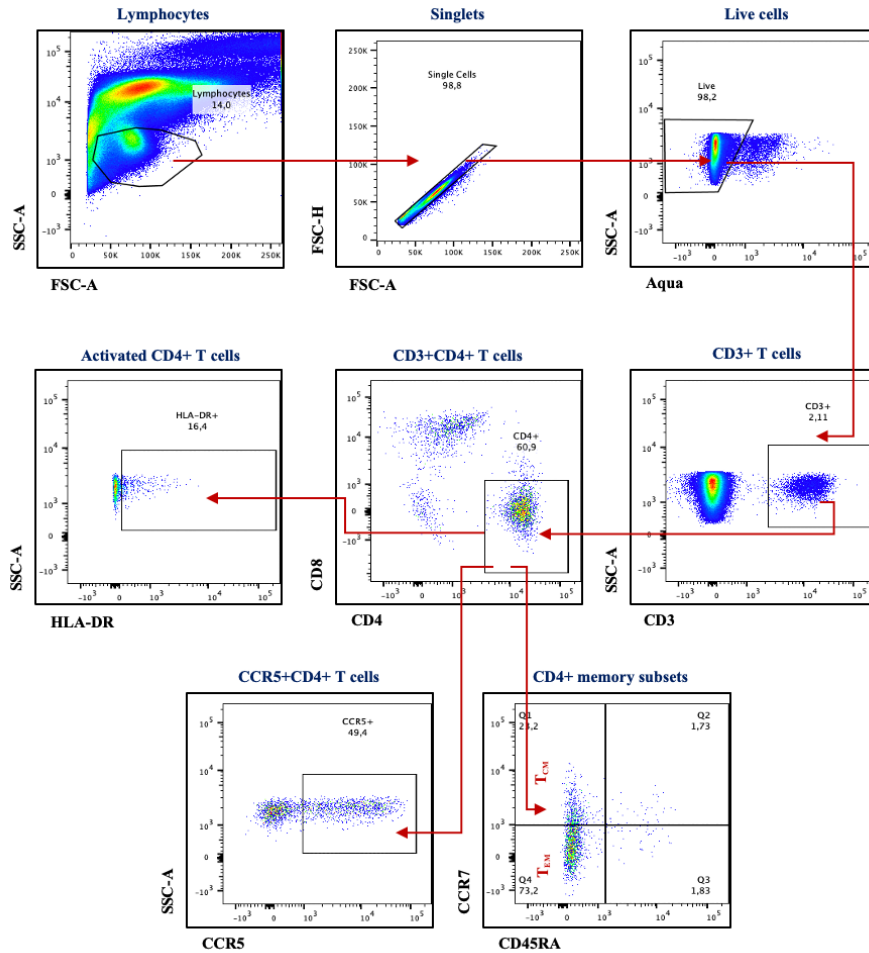

73

74

75 SUPPLEMENTARY FIGURE 3. Gating strategy and representative plots for endocervical  
76 activated, CCR5+ and memory CD4+ T cells subsets.

77 Cells were gated on lymphocytes, singlets, live, CD3+ cells, CD4+ cells, HLA-DR+CD4+ T  
78 cells (activated CD4+ T cells), CCR5+CD4+ T cells and CD4+ memory subsets (Central

79 memory: CCR7-CD45RA+; effector memory: CCR7-CD45RA-).

80 SUPPLEMENTARY FIGURE 4. Gating strategy and representative plots for endocervical  
 81 Dendritic cells population.

82

83

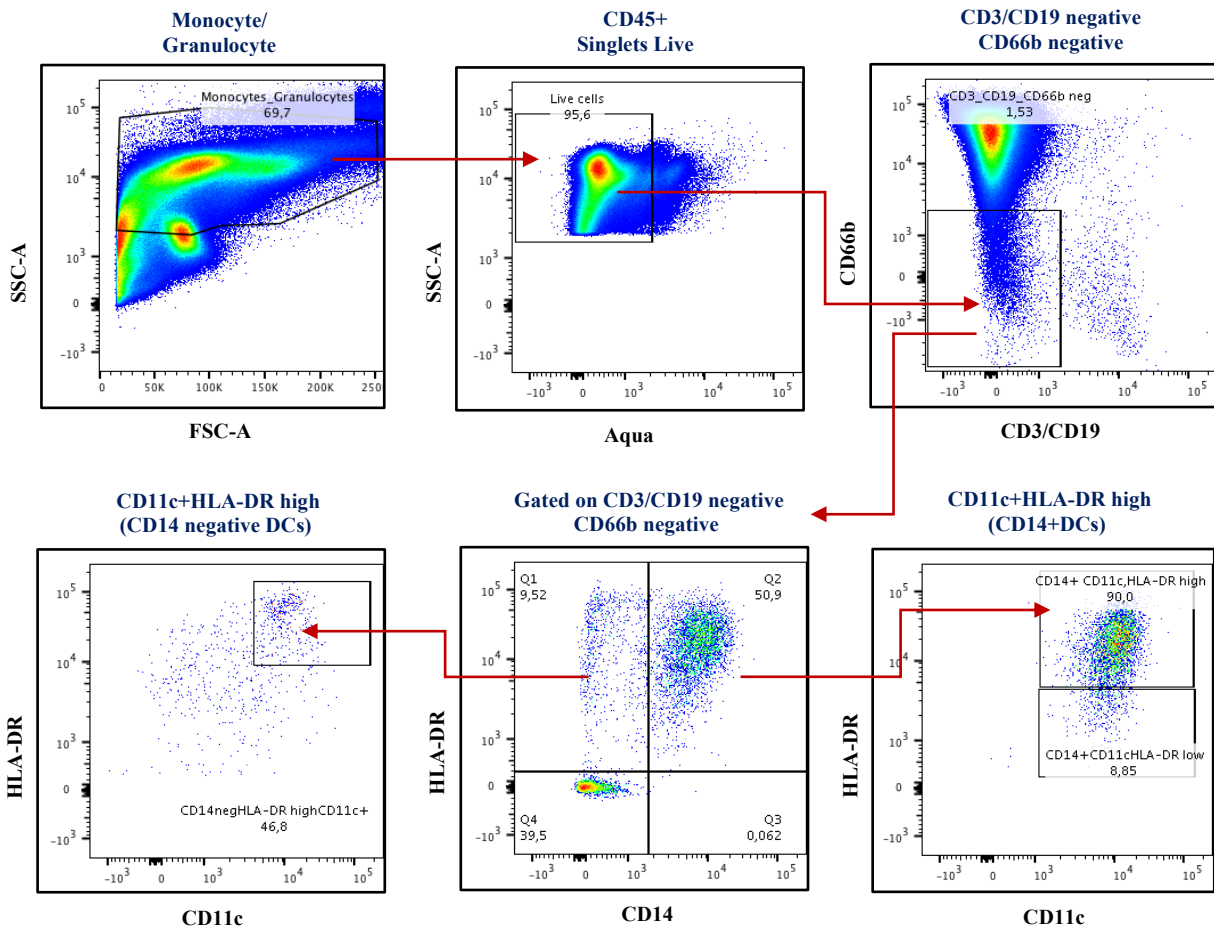

84

85

86

87

88

89 SUPPLEMENTARY FIGURE 4. Gating strategy and representative plots for endocervical

90 Dendritic cells population. Cells were gated on monocytes, CD45+ cells, singlets, CD3/CD19

91 negative, CD66b negative cells, based on CD14 and HLA-DR expressions two subsets of

92 dendritic cells (DCs): monocyte-derived DCs (CD11c+HLA-Dr highCD14+), CD14- DCs

93 (CD11c+ HLA-DR highCD14-).

94

95

96
